# Infectious Reactivation of Cytomegalovirus Explaining Age- and Sex-Specific Patterns of Seroprevalence

Michiel van Boven<sup>1\*</sup>, Jan van de Kasstele<sup>1</sup>, Marjolein J. Korndewal<sup>1,2</sup>, Christiaan H. van Dorp<sup>1,3</sup>, Mirjam Kretzschmar<sup>1,4</sup>, Fiona van der Klis<sup>1</sup>, Hester E. de Melker<sup>1</sup>, Ann C. Vossen<sup>1</sup>, Debbie van Baarle<sup>1</sup>

**1** Centre for Infectious Disease Control, National Institute for Public Health and the Environment, Bilthoven, the Netherlands

**2** Leiden University Medical Center, Department of Medical Microbiology, Leiden, the Netherlands

**3** Theoretical Biology & Bioinformatics, Utrecht University, Utrecht, the Netherlands

**4** Julius Center for Health Sciences and Primary Care, University Medical Center Utrecht, Utrecht, the Netherlands

\*corresponding author: [michiel.van.boven@rivm.nl](mailto:michiel.van.boven@rivm.nl)

January 20, 2017

## 1 **Abstract**

2 Human cytomegalovirus is a herpes virus with poorly understood transmission  
3 dynamics. We here provide quantitative estimates of the transmissibility of primary  
4 infection, reactivation, and re-infection using age- and sex-specific antibody response  
5 data. The data are optimally described by three distributions of antibody  
6 measurements, i.e. uninfected, infected, and infected after reactivation/re-infection.  
7 Estimates of seroprevalence increase gradually with age, such that at 80 years 73%  
8 (95%CrI: 64%-78%) of females and 62% (95%CrI: 55%-68%) of males is infected, while  
9 57% (95%CrI: 47%-67%) of females and 37% (95%CrI: 28%-46%) of males has  
10 experienced a reactivation or re-infection episode. Merging the statistical analyses with  
11 transmission models, we find that infectious reactivation is key to provide a good fit fit  
12 to the data. Estimated reactivation rates increase from low values in children to 2%-6%

13 per year older women. The results advance a hypothesis in which adult-to-adult  
14 transmission after infectious reactivation is the main driver of infection.

## 15 **Introduction**

16 Human cytomegalovirus (CMV) is a highly prevalent herpesvirus that infects between  
17 30% and 100% of persons in populations throughout the world [1]. Usually thought to  
18 be a relatively benign persistent infection, CMV is able to cause serious disease in the  
19 immunocompromised and offspring of pregnant women with an active infection [2–5].  
20 CMV also has been implicated in a variety of diseases in healthy persons [4, 6], and may  
21 play a role in aging of the immune system [7–10], perhaps thereby reducing the  
22 effectiveness of influenza vaccination in older persons [11–13].

23 Although the importance of CMV to public health is acknowledged, and even though  
24 the development and registration of a vaccine has been declared a priority [14, 15], little  
25 quantitative information is available on the transmission dynamics of CMV. At present,  
26 the only population-level data derive from serological studies, aiming to uncover which  
27 part of the population is infected at what age. These studies show that i) a sizable  
28 fraction of infants is infected perinatally (before 6 month of age), ii) seroprevalence  
29 increases gradually with age and is usually higher in females than in males, and iii) the  
30 probability of seropositivity is associated with both ethnicity and socioeconomic status,  
31 with non-western ethnicity and lower socioeconomic status being associated with higher  
32 rates of seropositivity [1, 16–19].

33 Person-to-person transmission of CMV to an uninfected person can occur from a  
34 primary infected person, or from a person who is experiencing a reactivation episode or  
35 has been reinfected [4]. Here, we analyze data from a large-scale serological study to  
36 obtain quantitative estimates of the relative importance of these transmission  
37 routes [19]. We fit mixture models linked to age- and sex-specific transmission models  
38 to the data to study the ability of different hypotheses explaining the serological data.  
39 Specifically, we quantify the incidence and transmissibility of primary infection,  
40 re-infection, and reactivation. Throughout, our premise is that measurements of  
41 antibody concentrations provide information on whether or not a person has been  
42 infected, and whether or not re-infection or reactivation have occurred. Persons with

43 low measurements are considered uninfected (susceptible), while persons with  
44 intermediate and high antibody concentrations are infected and infected with  
45 subsequent re-infection or reactivation, respectively.

46 We find that approximately 20% of infants is infected at the age of six months in the  
47 Netherlands, that seroprevalence (i.e. the fraction of the population that is infected)  
48 increases gradually with age to 60% and 70% in 80-year-old males and females, and that  
49 the fraction of the infected population with high antibody concentration increases from  
50 low values in children to 35% and 55% in elderly male and female persons, respectively.  
51 Reactivation rates are found to be substantially higher in females than in males. The  
52 analyses show that significant infectious reactivation in adults is necessary to explain  
53 the serological data, supporting the notion that infectious reactivation is an important  
54 driver of transmission.

55 The results have implications for control of CMV by vaccination, but also in a  
56 broader context, as increased antibody concentrations are an indicator of T cell immune  
57 memory inflation, impaired viral control, accelerated immunosenescence, and vascular  
58 pathologies (see [10, 20] and references therein).

## 59 **Results**

### 60 **Prevalence estimation**

61 Fig 1 presents the data stratified by sex and age, with fits of the statistical model (Fig 7  
62 for overview). The data and model fit show peaks at low antibody measurements ( $-2.9$   
63 U/ml and  $\approx -2$  U/ml), corresponding to uninfected persons (denoted by S, for  
64 susceptible; Methods). In both sexes, there is a third peak at higher measurements ( $1-3$   
65 U/ml) that shifts to higher values with increasing age. This peak is composed of  
66 persons who are infected (denoted by L, for latently infected) and persons who are  
67 infected with high antibody concentrations (denoted by B, for boosted antibodies).  
68 Using the estimated distributions for these classes, we find that classification of persons  
69 as uninfected versus infected is near perfect (Youden index: 0.97), while classification of  
70 persons with high antibody concentrations is good (Youden index: 0.71; Fig 2, Fig 8).  
71 These results correspond well with the threshold for infection of the supplier by the

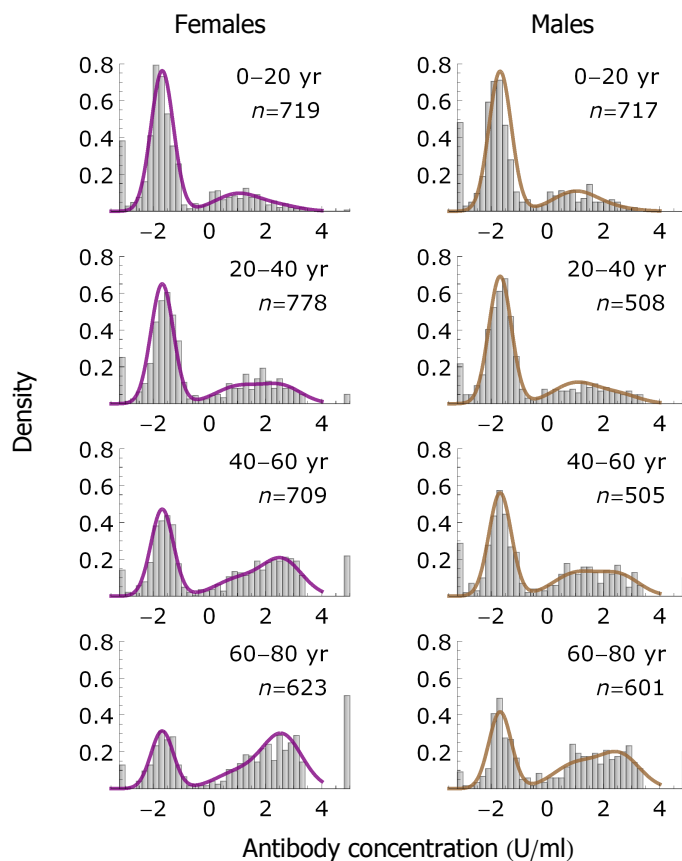

**Fig 1. Data and model fit.** Data (histograms) and model fit (lines) of antibody concentration measurements by age group and sex. Left- and right-hand panels show results for females (purple) and males (brown), respectively. The leftmost bars at -2.9 contain samples that are assumed uninfected, and the rightmost bars at 4.5 contain samples that are right censored (with concentration >3.41; Methods). Insets show the age group and number of samples.

72 assay (-0.8 U/ml), and show that our classification with three components is supported  
73 by the data (i.e. has high probability of yielding an informed decision).

74 Fig 3 shows the estimated prevalences in females and males as a function of age.  
75 The susceptible prevalence decreases gradually with age, from approximately 0.80 in  
76 infants (females: 0.81, 95%CrI: 0.77-0.85; males: 0.80, 95%CrI: 0.76-0.84) to 0.27  
77 (95%CrI: 0.22-0.34) and 0.38 (95%CrI: 0.32-0.45) at 80 years in females and males,  
78 respectively. In both females and males the latently infected prevalence remains  
79 approximately constant, ranging from 0.15 to 0.20 in females and from 0.18 to 0.28 in  
80 males. In contrast, the prevalence of persons with increased antibodies increases  
81 strongly with age, especially in females. In fact, the prevalence of persons with

82 increased antibodies increases from 0.09 (95%CrI: 0.06-0.13) at 20 years to 0.57  
83 (95%CrI: 0.47-0.67) at 80 years in females, and from 0.04 (95%CrI: 0.03-0.07) to 0.37  
84 (95%CrI: 0.28-0.46) in males. Hence, in older persons the prevalence of persons with  
85 increased antibodies is 54% (or 20 per cent points) higher in females than in males.

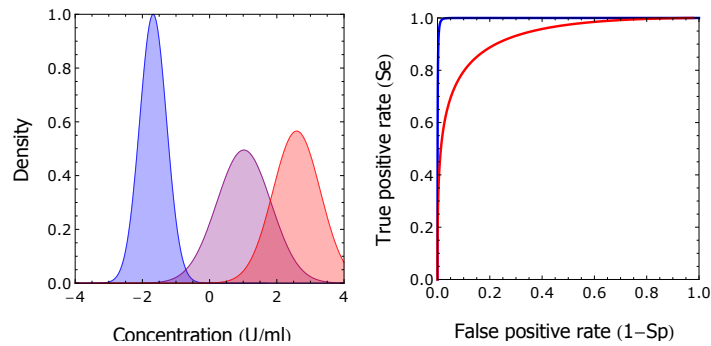

**Fig 2. Classification of samples.** Shown are the estimated mixture distributions using the parameter medians of the posterior distribution (left-hand panel; blue: susceptible; purple: infected); red: infected with increased antibody concentration), and receiver operating characteristic of binary classifications taking the estimated distributions as ground truth (right-hand panel). Maximal sum of sensitivity and specificity (Se+Sp) for classification of uninfected versus infected persons is 1.97 at antibody concentration -0.70 U/ml, with sensitivity 0.99 and specificity 0.98 (Figure S8). This value corresponds well with the threshold for infection of -0.8 U/ml suggested by the supplier of the assay. Maximal Se+Sp for classification of persons with increased antibody concentration is 1.70 at antibody concentration 1.81 U/ml, with sensitivity 0.84 and specificity 0.87 (Fig 8).

86 Of particular interest is the prevalence of infection in females of childbearing age, as  
87 this group is at risk of transmission to the fetus or newborn. Using the above analyses,  
88 we find that the prevalence of infection (i.e. the combined prevalence in the L and B  
89 classes) is 0.30 (95%CrI: 0.27-0.33) in 20-year-old females and 0.42 (95%CrI: 0.39-0.46)  
90 in 40-year-old females. If we combine these figures with the observation that  
91 approximately 20% of children infected at six months of age, and that less than 5% of  
92 children in the Netherlands in 2007 had a mother under 20 years or over 40 years, we  
93 deduce that the probability of perinatal transmission could be between  $0.20/0.42=0.48$   
94 and  $0.20/0.30=0.67$ , with the exact figure depending on the distribution of ages at  
95 which mothers give birth. In addition, one could envisage that the highest risk of  
96 (severe) infection of the fetus or newborn is when mothers are infected or experience a  
97 reactivation episode. The estimated rates at which susceptible females of 20 and 40

98 years are infected are 0.0055 per year (95%CrI: 0.0036-0.0077) and 0.0092 per year  
99 (95%CrI: 0.0069-0.011) per year, respectively. The rates at which latently infected  
100 females of 20 and 40 years are re-infected or experience a reactivation episode are of  
101 similar magnitude, and are estimated at 0.0059 per year (95%CrI: 0.0038-0.0086) and  
102 0.0093 per year (95%CrI: 0.0064-0.012), respectively. The overall rates of infection,  
103 reactivation, and re-infection in 20 and 40 year-old females are given by the sum of the  
104 above estimates, and are approximately 1% and 2% per year, respectively.

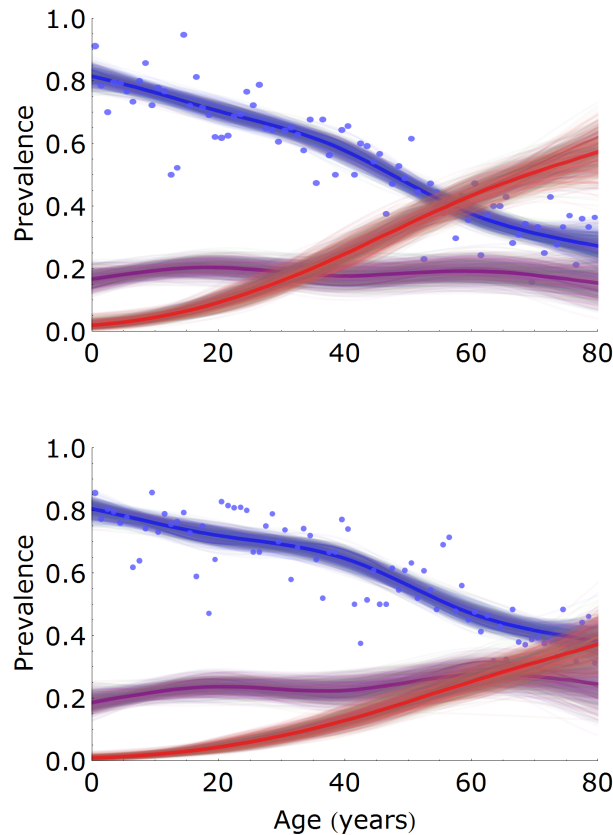

**Fig 3. Estimation of age- and sex-specific prevalence.** Prevalence estimates are presented for females (top) and males (bottom), and for classes of low (susceptible, blue), medium (latently infected, purple), and high (latently infected with increased antibodies, red) antibody measurements. Shown are 1,000 samples from the posterior distribution (thin lines) with posterior medians (bold lines). Dots indicate the fraction of samples in each year-class that would be classified as uninfected with the cut-off specified by the supplier of the assay. The number of samples per year-class is approximately 35 and 30 for females and males, respectively.

**Table 1. Model selection of transmission scenarios.**

| Scenario                                 | $n$ | $\ell_{max}$ | $\Delta AIC$ |
|------------------------------------------|-----|--------------|--------------|
| Full model                               | 9   | -7195.2      | 2.0          |
| No re-infection                          | 8   | -7195.2      | 0            |
| No reactivation                          | 3   | -7413.3      | 426.3        |
| Reactivation/re-infection not infectious | 8   | -7233.8      | 75.2         |

For each of four model scenarios the number of parameters, maximal log-likelihood  $\ell_{max}$ , and AIC difference with the best fitting model are given.

## 105 Estimation of reactivation and re-infection rates

106 Naive estimates of the reactivation and re-infection rates can be obtained by  
107 transformation of the spline prevalence estimates (Methods), indicating that infectious  
108 reactivation is required to explain the serological data (Fig 9). Estimation with the  
109 transmission model confirms these findings, and shows that a model without  
110 reactivation fits the data worse ( $\Delta AIC=426.3$ ) than either a model with reactivation  
111 and re-infection (full model), or a model with reactivation but no re-infection (Table 1;  
112 Methods). A fourth model with reactivation and re-infection that is not infectious  
113 ( $\beta_2 \equiv 0$ ) performs better than the model without reactivation, but worse than either the  
114 full model or the model with no re-infection ( $\Delta AIC=75.2$ ).

115 The prevalences estimated with the mixture model and the corresponding maximum  
116 likelihood estimates of the transmission models are given in Fig 10, and show that a  
117 transmission model without reactivation overestimates the prevalence of infection,  
118 especially in children. Overall, models without infectious reactivation have low empirical  
119 support, while there is no decisive statistical evidence in favor of either a model with  
120 infectious reactivation and infectious re-infection ( $\Delta AIC= 2.0$ ) or a model with  
121 infectious reactivation only (highest AIC; [21]). These results are supplemented and  
122 supported in a Bayesian analysis of the latter two models (Methods). Using the  
123 Watanabe Akaike information criterion (WAIC) that better gauges out-of-sample  
124 predictive performance than AIC we find similar performance of both models  
125 (WAIC=14,410.4 for the full model versus WAIC=14,409.1 for the model without  
126 re-infection; [22, 23]).

127 Inspection of the parameter posterior medians of the two best-performing models  
128 shows that both yield similar estimates of the transmissibility of primary infection  
129 ( $\widehat{\beta}_1=0.0015$  per year (95%CrI:  $6.2 \cdot 10^{-5}$ -0.0072) for the full model and  $\widehat{\beta}_1=0.0014$  per

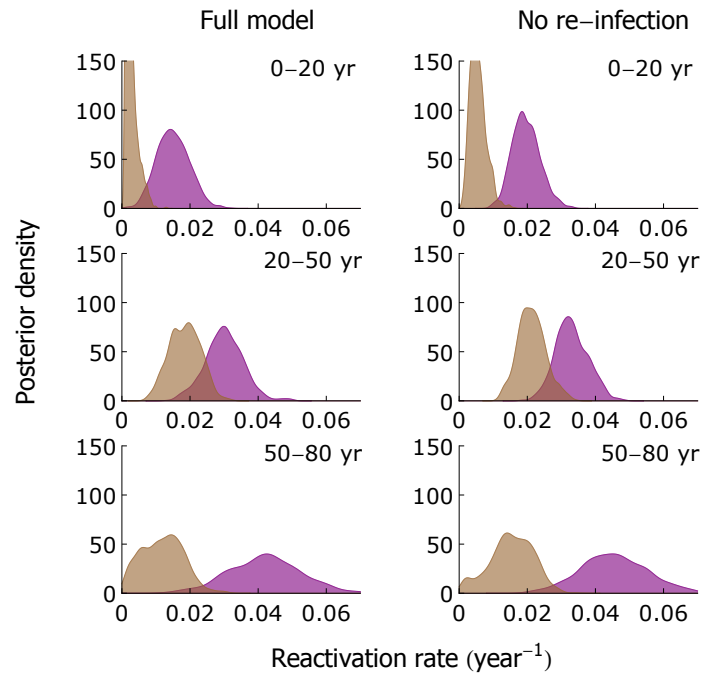

**Fig 4. Estimation of age-specific reactivation rates.** Shown are kernel-smoothed estimates of the reactivation rates in persons aged 0-20 years (top), 20-50 years (middle), and 50-80 years (bottom) in the full model (left-hand panels) and model without re-infection (right-hand panels; Table 1). Estimates for females and males are shown in purple and brown, respectively.

130 year (95%CrI:  $4.9 \cdot 10^{-5}$ -0.0071) for the model without re-infection), and nearly identical  
 131 estimates of the transmissibility of reactivation and re-infection ( $\widehat{\beta}_2=0.052$  per year  
 132 (95%CrI: 0.045-0.057) in both scenarios). In the model without re-infection the  
 133 proportionality parameter governing the re-infection rate (the probability of re-infection  
 134 in a contact that would lead to infection if the contacted person were uninfected) is zero  
 135 by definition, and in the full model the proportionality parameter is dominated by the  
 136 prior distribution  $U(0, 1)$ , indicating that it cannot be estimated with meaningful  
 137 precision from the data ( $\widehat{z}=0.33$ ; 95%CrI: 0.035-0.78).

138 Estimates of the reactivation rates are quantitatively close in models with  
 139 reactivation (Fig 4). Reactivation rates generally increase with increasing age, and are  
 140 substantially higher in females than in males. In the full model, the estimated  
 141 reactivation rate is 0.015 per year (95%CrI: 0.0064-0.025) in 0-20 year-old females,  
 142 which doubles to 0.030 per year (95%CrI: 0.019-0.041) in 20-50 year-old females, and  
 143 then increases further to 0.042 per year (95%CrI: 0.021-0.062) in 50+-year-old females.



144 The corresponding reactivation rates in males are 0.0022 per year (95%CrI:  
145 0.0010-0.0074), 0.019 per year (95%CrI: 0.0098-0.029), and 0.012 per year (95%CrI:  
146 0.0015-0.023). In the model without re-infection these estimates are 0.019 per year  
147 (95%CrI: 0.012-0.028), 0.033 per year (95%CrI: 0.024-0.043), and 0.045 per year  
148 (95%CrI: 0.026-0.064) in females, and 0.0052 per year (95%CrI: 0.0019-0.010), 0.021 per  
149 year (95%CrI: 0.014-0.030), and 0.015 per year (95%CrI: 0.0016-0.027) in males. Hence,  
150 estimates of reactivation rates are higher and slightly more precise in the model without  
151 re-infection than in the model with re-infection.

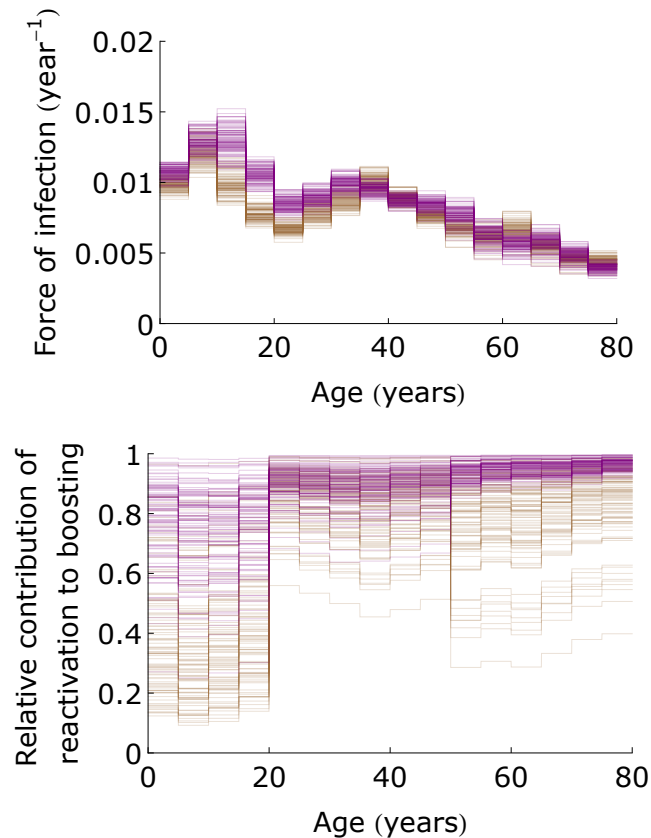

**Fig 5. The force of infection and contribution of reactivation to antibody boosting.** Shown are estimates of the forces of infection in females and males (top; purple: females; brown: males) and relative contributions of reactivation to antibody boosting ( $\rho^i(a) / (\rho^i(a) + z\lambda^i(a))$  with  $i \in \{\varphi, \sigma\}$ ) (bottom) in the full model as a function of age. Both panels show 100 samples from the posterior distribution.

152 In both models with reactivation, estimates of the force of infection increase from  
153 approximately 0.01 per year in the youngest age group to 0.012-0.014 per year in 10-15  
154 year-old girls (Fig 5). Owing to the slightly higher contact rates in females than in men,

155 the estimated force of infection is usually a couple percentage points higher in females  
156 than in males in the age groups 10-25 years [24]. In older age groups, estimates of the  
157 forces of infection decrease to lower values (0.005-0.01 per year). Noteworthy, the  
158 extreme age-specific differences in the force of infection usually observed for directly  
159 transmitted infectious diseases, with high infection rates in children and much lower  
160 rates in adults, are much less pronounced here due to infectious reactivation combined  
161 with age-assortative mixing (Fig 10) [24–26].

162 Further, estimates of re-infection rate ( $z\lambda(a)$ ) are considerably smaller than  
163 estimates of the reactivation rates ( $\rho^{\varnothing}(a)$  and  $\rho^{\sigma}(a)$ ) because the estimated force of  
164 infection ( $\lambda(a)$ ) is small in all age groups (Fig 5). Hence, re-infection contributes little  
165 to boosting of the antibody concentrations in those age groups where most of the  
166 boosting occurs (>20 years; Fig 3).

## 167 Discussion

168 Our study of population-wide serological data shows that IgG antibody concentrations  
169 contain a wealth of information on the transmission dynamics of CMV. Specifically, the  
170 analyses reveal that (i) the prevalence of CMV increases gradually with age such that at  
171 old age the majority of persons in the Netherlands are infected; (ii) except for the very  
172 young, prevalence of CMV is systematically higher in females than in males. This is  
173 mainly due to a higher incidence of infection in adult women than in adult men of  
174 similar age; (iii) antibody concentrations in seropositive (i.e. infected) persons increase  
175 monotonically with age, especially in women; (iv) the above findings (i)-(iii) cannot be  
176 explained by simple transmission models in which only primary infection is infectious.  
177 This is caused by the fact that transmissibility of primary infection determines the rate  
178 at which age-specific prevalence increases; if transmissibility of primary infection would  
179 be high then a high prevalence of infection is expected in children (Fig 10). In other  
180 words, the fact that seroprevalence increases gradually with age puts an upper bound on  
181 the force of infection, and this in turn constrains the transmissibility of primary  
182 infection to low values.

183 While aforementioned findings (i)-(iii) have been noticed before in other settings ([1]  
184 and references therein, [19]), our analyses are the first to provide precise estimates using

185 a large population sample. Moreover, the analyses advance a transmission hypothesis  
186 based on the notion that reactivation contributes significantly to the transmission  
187 dynamics of CMV. Since prevalence of infection has been shown to increase in a gradual  
188 manner in several other studies [1], this explanation may not be restricted to the Dutch  
189 situation, but hold in general. Underpinning this hypothesis, next to the well-known  
190 observations of shedding of CMV in breast milk and cervical material in the third  
191 trimester of pregnancy [27–29], detectable virus also has been found in some healthy  
192 persons under 70 years and in all persons over 70 years in one study [31], while in  
193 another study CMV DNA has been detected in urine of the majority of older  
194 persons [32]. These findings add to our belief that infectious reactivation may be a  
195 plausible explanation for the patterns of infection observed in serological data.

196 The main implication is that the majority of CMV infections may not be caused by  
197 transmission among children after primary infection, even though levels of shedding can  
198 be high in infants [28,33], but rather by older persons who go through a reactivation  
199 episode. As a result, infectious reactivation is expected to be an important driver of  
200 CMV transmission in the population. This contrasts with common childhood diseases  
201 such as measles, mumps, rubella, and pertussis, for which infection in unvaccinated  
202 populations generally occurs at a young age and children are the drivers of transmission.  
203 It also contrasts with other herpes viruses such as varicella zoster virus and Epstein-Bar  
204 virus for which well over 50% of the population is infected at the age of 10 years [25]. It  
205 may be comparable with other herpes viruses such as HSV1 and HSV2, which show a  
206 slowly increasing age-specific seroprevalence [34]. A corollary is that primary CMV  
207 infection alone is unlikely to be able to maintain sustained transmission in the  
208 population. In fact, further analyses based on the current parameter estimates suggest  
209 that primary infection coupled with infectious reactivation would not be sufficient to  
210 ensure persistence, as the estimated basic reproduction number is smaller than the  
211 threshold value 1 (Methods; Fig 12). This, in turn, indicates that perinatal transmission  
212 is required for persistence.

213 With infectious reactivation and perinatal infection being putative drivers of  
214 transmission, it is to be expected that elimination by vaccination may prove more  
215 difficult than for directly transmitted pathogens, as it will require the pool of latently  
216 infected persons to dwindle to zero by demographic turnover. This can take up to the

217 lifetime of one generation, and perhaps more if vaccination cannot prevent perinatal  
218 transmission to infants who are too young for vaccination. Thus, a question is whether  
219 vaccination formulations and strategies exist that minimize the probability of  
220 transmission to young infants. This is all the more of importance as a main source of  
221 morbidity is by congenital infection, and the timescale on which reductions in congenital  
222 disease are expected determines the projected health impact of vaccination [35]. In this  
223 context, next to the ability of a vaccine to prevent infection it may perhaps be equally  
224 important that a vaccine is able to reduce the probability of reactivation. Such  
225 reductions are likely mediated by T-cell responses of the host, and several (but not all)  
226 vaccines under development are expected to induce boosting of T-cell immune  
227 responses [36–38].

228 A number of limitations and assumptions deserve scrutiny. First, the transmission  
229 model analyses assume that the population is in endemic equilibrium. For a single  
230 cross-sectional data set such as considered in the present study this assumption is  
231 unavoidable if one does not want to introduce additional parameters that cannot be  
232 estimated by the data. Reassuringly, the patterns of infection present in the serological  
233 data have been found in several serological studies carried out in high-income countries  
234 over the past decades [1]. Also, no systematic patterns of increasing or decreasing  
235 seroprevalence over time have been found, and this is further reason to believe that  
236 there have not been major changes in the epidemiology of CMV over time [1]. Second,  
237 we assume that antibody measurements not only give information on CMV infection  
238 status, but also whether or not reactivation/re-infection have taken place.  
239 Unfortunately, there is no direct empirical evidence available confirming or falsifying  
240 this assumption, and this is an area where in-depth comparison of the infection and  
241 immune status of persons with low and high antibody concentrations is urgently needed.  
242 Third, the analyses assume that person-to-person transmission is proportional to  
243 observed human contact patterns (Fig 11; [24,39]). Although this assumption is  
244 commonly made and has met with considerable success (e.g., [39–42]), it is conceivable  
245 that transmission of CMV does not abide by the social contact hypothesis, and that a  
246 more complex contact structure would be able to explain the patterns of seroprevalence  
247 in a simple transmission model. To investigate the impact of the contact structure, we  
248 have re-analyzed all transmission model with a uniform contact structure, and found

249 that a model with infectious reactivation provides the best fit to the data (not shown).  
250 By extension, it also remains a possibility that the patterns of infection are generated  
251 by a complex pattern of susceptibility increasing with age. Again, evidence for or  
252 against this possibility is lacking.

253 Throughout, the analyses are based on the observation that, at the population level,  
254 CMV IgG antibody concentrations are well-described by three distributions. We have  
255 exploited this observation to build a transmission model with three classes, pertaining  
256 to persons who are uninfected, infected, or infected after reactivation or re-infection. In  
257 this model, a person experiences at most one reactivation or re-infection event during its  
258 lifetime. In reality, it is more likely that such reactivation and/or re-infection events  
259 may occur more often. Unfortunately, it is not possible to statistically identify the  
260 parameters in models that would include multiple reactivations/re-infection events. As  
261 a result, transitions from the infected class to the infected class with increased  
262 antibodies may in fact be the result of multiple underlying reactivation or re-infection  
263 events, and the infectiousness parameter of reactivation and re-infection should be  
264 interpreted as a compound parameter describing the overall impact of multiple  
265 reactivations and re-infections. This may help explain why estimated infectiousness of  
266 primary infection is much lower than estimated infectiousness after reactivation or  
267 re-infection, even though it is known that prolonged and high-level virus shedding can  
268 occur in bodily fluids after primary infection in children [28,29].

## 269 **Materials and Methods**

### 270 **Study design**

271 The analyses make use of sera from the PIENTER2 project, a cross-sectional  
272 population-based study carried out in the Netherlands in 2006-2007. Details have been  
273 published elsewhere [19]. Briefly, 40 municipalities distributed over five geographic  
274 regions of the Netherlands were randomly selected with probabilities proportional to  
275 their population size, and an age-stratified sample was drawn from the population  
276 register. A total of 19,781 persons were invited to complete a questionnaire and donate  
277 a blood sample. Serum samples and questionnaires were obtained from 6,382

278 participants. To exclude the interference of maternal antibodies, we restrict analyses to  
279 sera from persons older than 6 months (6,215 samples). We further select Dutch persons  
280 and migrants of Western ethnicity to preclude confounding by ethnicity (5,179 samples)  
281 and stratify the data by sex [19], yielding 2,842 and 2,337 samples from female and male  
282 participants, respectively. The data are available at GitHub  
283 ([github.com/mvboven/cmV-serology](https://github.com/mvboven/cmV-serology)).

## 284 **Ethics**

285 The study was approved by the Medical Ethics Testing Committee of the foundation of  
286 therapeutic evaluation of medicines (METC-STEG) in Almere, the Netherlands (clinical  
287 trial number: ISRCTN 20164309). All participants or their legal representatives had  
288 given written informed consent. Details of the study are given elsewhere [30].

## 289 **Antibody assay**

290 We use the ETI-CYTOK-G PLUS (DiaSorin, Saluggia, Italy) Elisa to detect  
291 CMV-specific IgG antibodies. The assay yields continuous measurements (henceforth  
292 called 'antibody concentration') and has an upper limit of 10 units/ml in our test  
293 setting. A small number of samples is right-censored at this limit (140 persons).  
294 According to the provider of the assay, samples with measurement lower than 0.4  
295 units/ml should be classified as uninfected, while samples with measurement  $\geq 0.4$   
296 units/ml should be classified as infected.

## 297 **Mixture model**

298 The data are analyzed using a mixture model with sex- and age-specific mixing  
299 functions. A Box-Cox transformation with parameter  $\psi=0.3$  yields a distribution of  
300 antibody measurements of samples with low antibody concentration that is  
301 approximately Normal, and we henceforth base all analyses on the transformed  
302 measurements (denoted by U/ml). The estimated prevalences are robust to this  
303 transformation, which merely serves to ensure that the data are well-described by  
304 Normal mixture distributions (not shown). We distinguish three distributions,  
305 describing samples with low (susceptible, S), intermediate (latently infected, L), and

306 high (increased antibodies, B) antibody concentrations. The L and B distributions are  
307 modeled by a Normal distribution with means and standard deviations independent of  
308 age and sex, and the S distribution is modeled by a mixture of a spike and a normal  
309 distribution (see below).

310 Right-censoring is applied to the 140 samples above the upper limit of 3.41 U/ml (10  
311 units/ml on the original scale). As there appears a spike at -2.91 U/ml (0.0001 units/ml  
312 on the original scale) in the data (263 persons), we model the S component by a  
313 mixture of a spike at this value and a Normal distribution (i.e. an inflated normal  
314 distribution). In this way, samples with concentration at the spike belong to the  
315 susceptible component with probability 1.

316 We model the probability of each of the three outcomes in terms of log-odds, taking  
317 the probability of being in the S component as reference. This allows us to write the  
318 log-odds of being in component L or B as linear functions of age and sex. The design  
319 matrix of the resulting multinomial logistic model consists of natural cubic splines with  
320 interior knots at 20, 40 and 60 years and boundary knots at 0 and 80 years. Hence, the  
321 mixing functions (prevalences) have flexible shape, which allows these to be optimally  
322 informed by the data. In the results, sex is put in the model as main effect, as analyses  
323 show no noticeable improvement in fit when including age by sex interaction (not  
324 shown).

325 We estimate parameters in a Bayesian framework using R and JAGS [43, 44].  
326 Non-informative Normal prior distributions are set on the means of the three component  
327 distributions ( $\mathcal{N}(0, 0.001)$ ). Label switching is prevented by prior ordering of the means.  
328 The precisions of the components are given flat Gamma prior distributions  
329 ( $\Gamma(0.5, 0.005)$ ). The spline parameters are also given non-informative Normal prior  
330 distributions ( $\mathcal{N}(0, 0.001)$ ). We apply a QR-decomposition to the design matrix to  
331 improve mixing and run 10 MCMC chains in parallel, yielding a total of 10,000 samples.  
332 Although mixing of the unthinned samples is already satisfactory, we apply an  
333 additional 1/10 thinning, giving a total of 1,000 samples from the posterior distribution.

## 334 **Classification**

335 The distributions characterizing the subpopulations with low (susceptible, S),  
336 intermediate (latently infected, L), and high (increased antibodies, B) antibody  
337 concentrations allow assignment of probabilities to individual samples. For any single  
338 observed sample we can calculate the probability that the corresponding person is  
339 susceptible, latently infected, or latently infected with increased antibodies. In detection  
340 theory, the specificity (the probability of correctly classifying a negative subject) and  
341 sensitivity (the probability of correctly classifying a positive subject) are used to  
342 characterize the power of a detection procedure. The relation between sensitivity and  
343 specificity may be graphed with antibody concentration specifying a cut-off for binary  
344 classification as a parameter in a receiver operating characteristic (ROC)  
345 graph [42, 45, 46]. Here, we investigate the ability of the mixture analyses to distinguish  
346 uninfected (S) from infected (L+B) samples, and to distinguish samples with increased  
347 antibody concentration (B) from uninfected and latently infected samples (S+L). The  
348 results are laid down in Fig 2 and Fig 8.

## 349 **Transmission model**

350 Next to the statistical analysis using mixture models, we analyze the data with  
351 transmission models. The transmission models take the estimated mixture distributions  
352 or, more precisely, the medians of the posterior distribution as input. In line with the  
353 above, we focus on a sex- and age-structured model in which persons are  
354 probabilistically classified in one of three classes, viz. uninfected (S), latently infected  
355 (L), and latently infected after reactivation or re-infection (B). As the infectious period  
356 is short relative to the lifespan of the host (weeks versus decades) we do not explicitly  
357 model the infectious periods, and assume that the transitions from the S to the L and  
358 from the L to the B classes occur instantaneous (the short-disease approximation, [47]).  
359 Further, we focus on the endemic equilibrium of the transmission model so that all  
360 variables are time-independent [47, 48]. Fig 6 shows a schematic of the model. For sexes



361  $i \in \{\varphi, \sigma\}$ , the age-dependent differential equations are given by

$$\begin{aligned} \frac{dS^i(a)}{da} &= -\lambda^i(a)S^i(a) \\ \frac{dL^i(a)}{da} &= \lambda^i(a)S^i(a) - (\rho^i(a) + z\lambda^i(a))L^i(a) \\ \frac{dB^i(a)}{da} &= (\rho^i(a) + z\lambda^i(a))L^i(a), \end{aligned} \quad (1)$$

362 with forces of infection

$$\lambda^i(a) = \sum_{j \in \{\varphi, \sigma\}} \int_0^M c^{ij}(a, a') (\beta_1 \lambda^j(a') S^j(a') + \beta_2 (\rho^j(a') + z\lambda^j(a')) L^j(a')) da'. \quad (2)$$

363 In Eqs (1)-(2),  $z\lambda^j(a)$  and Eq  $\rho^j(a)$  are the age-specific re-infection and reactivation  
 364 rates,  $z$  is the susceptibility to re-infection of latently infected persons relative to the  
 365 susceptibility of uninfected persons ( $0 \leq z \leq 1$ ),  $c^{ij}(a, a')$  represents the contact rate  
 366 between persons of age  $a'$  and sex  $j$ , and those of age  $a$  and sex  $i$  [24,39],  $\beta_1$  and  $\beta_2$  are  
 367 proportionality parameters determining the transmissibility of primary infection and  
 368 reactivation/re-infection, and  $M$  is the maximum age. As the data do not extend  
 369 beyond 80 years we take  $M = 80$  years. Notice that  $\lambda^j(a)S^j(a)$  and  
 370  $(\rho^j(a) + z\lambda^j(a))L^j(a)$  are the incidence of primary infection and the incidence of  
 371 reactivation and re-infection, so that  $\beta_1 \lambda^j(a)S^j(a)$  and  $\beta_2 (\rho^j(a) + z\lambda^j(a))L^j(a)$  are  
 372 the infectious output generated by primary infection and reactivation/re-infection,  
 373 respectively [47].

374 As in earlier studies, contact rates (contact intensities in the notation of [24] are  
 375 hard-wired into the model using data on social contact patterns, thereby adopting the  
 376 social contact hypothesis [24,25,39]. Here we use the mixing matrix of an analysis of  
 377 the data from the Netherlands gathered in 2006/2007 with demographic composition of  
 378 the Dutch population in 2007 [24]. See Fig 11 and GitHub  
 379 ([github.com/mvboven/cm-v-serology](https://github.com/mvboven/cm-v-serology)) for the contact matrix and demographic data.

380 The differential equations can be solved in terms of the forces of infection using the  
 381 variation of constants method. Here we assume, based on results of the mixture model,  
 382 that a non-negligible fraction of infants is infected in the first six months of life and the  
 383 fraction infected is equal in female and male infants [19]. Hence, we have  
 384  $S^\varphi(0) = S^\sigma(0) = S_0$ ,  $L^\varphi(0) = L^\sigma(0) = 1 - S_0$ , and  $B^\varphi(0) = B^\sigma(0) = 0$  as initial

$$S^i(a) \xrightarrow[\text{infection}]{\lambda^i(a)} L^i(a) \xrightarrow[\text{reactivation/re-infection}]{\rho^i(a) + z \lambda^i(a)} B^i(a)$$

**Fig 6. Schematic of the model.**  $S^i(a)$  denotes the age-specific proportion of uninfected persons of sex  $i$  ( $i \in \{\varphi, \sigma\}$ ),  $L^i(a)$  represents the age-specific proportion of latently infected persons, and  $B^i(a)$  is the age-specific proportion of infected persons with increased antibody concentration. The infection and re-infection rates are given by  $\lambda^i(a)$  and  $z\lambda^i(a)$ , and the reactivation rates are given by  $\rho^i(a)$ .

385 conditions, and the solution of (1) is given by

$$\begin{aligned} S^i(a) &= S_0^i e^{-\int_0^a \lambda(\tau) d\tau} \\ L^i(a) &= (1 - S_0^i) e^{-\int_0^a \rho(\tau) + z\lambda(\tau) d\tau} + \\ &S_0^i \int_0^a \lambda(\tau) e^{-\int_0^\tau \lambda(\tau') d\tau' - \int_\tau^a \rho(\tau') + z\lambda(\tau') d\tau'} d\tau . \end{aligned} \quad (3)$$

386 Insertion of Eq (3) in Eq (2) yields two integral equations for the age-specific forces of  
 387 infection in females and males [25, 26, 49, 50]. These equations cannot be solved  
 388 explicitly in general. It is possible, however, to solve the equations for specific functions.  
 389 Here we assume that transition rates and contact rates are constant on predefined  
 390 age-intervals, and insert the explicit solution of Eq (3) in terms of force of infection in  
 391 Equation (2) (see below).

### 392 Naive estimation

393 Before turning attention to estimation based on the full transmission model, we would  
 394 like to remark that naive estimates of the force of infection and reactivation rate that do  
 395 not take the infection feedback (i.e. Eq 2) into account can be obtained by  
 396 transformation of the spline prevalence estimates. Specifically, rearranging the model  
 397 equations (Eq (1)) yields the following expressions for the force of infection and  
 398 reactivation rate

$$\begin{aligned} \lambda(a) &= -\frac{d}{da} \log(S(a)) \\ \rho(a) &= \frac{dB(a)}{da} \frac{1}{L(a)} - z\lambda(a) , \end{aligned} \quad (4)$$

399 where superscripts denoting sex have been dropped for notational convenience. Since  
 400 the prevalences  $S(a)$ ,  $L(a)$ , and  $B(a)$  are known (the spline estimates) and can be

401 differentiated, this immediately yields an estimate of the force of infection  $\lambda(a)$  and  
 402 subsequently also an estimate of the reactivation rate  $\rho(a)$  (if  $z$  is assumed known).  
 403 Notice that these estimates are not necessarily compatible with the transmission model.  
 404 In particular, the rates so estimated are not necessarily positive (Fig 9).

405 Assuming that re-infection is negligible ( $z=0$ ), we find that estimates of the forces of  
 406 infection are low up to the age of 40 years in both females and males (generally  $<0.01$   
 407 per year), increase to higher values in adults aged 40-60 years (0.01-0.03 per year), and  
 408 are variable in older adults (Fig 9). Estimates of the reactivation rates increase from low  
 409 values in children to 0.03-0.08 per year in 40-year-old females, and to approximately  
 410 0.02 per year in 40-year-old males. At older ages, estimates of the reactivation rates are  
 411 variable, and have the tendency to drop to slightly lower values. If we take the  
 412 alternative extreme that primary infection and re-infection occur at identical rates  
 413 ( $z = 1$ ), estimates of the reactivation rates are lower but the general pattern of  
 414 substantial reactivation in adults remains (Fig 9).

## 415 Numerical solution of the forces of infection

416 For statistical analysis based on the full transmission model (Eqs 1)-(2) we assume that  
 417 reactivation and contact rates are constant in certain predefined age-intervals. From  
 418 Eq (2), it then follows that the force of infection is piecewise constant as well.  
 419 Throughout, we consider age intervals of fixed size  $\Delta a = 5$  years, so that the limits of  
 420 the  $n = M/\Delta a = 16$  age classes are defined by the vector  $\mathbf{a} = (0, \Delta a, 2\Delta a, \dots, n\Delta a)$ .  
 421 Hence, the  $j$ -th class ( $j = 1, \dots, n$ ) contains all persons with age in the interval  
 422  $[a_{[j]}, a_{[j+1]})$ , where  $a_{[j]}$  denotes the  $j$ -th element of  $\mathbf{a}$ . Subsequently, the forces of  
 423 infection  $\lambda^i(a)$  and reactivation rates  $\rho^i(a)$  are replaced by their counterparts  $\lambda_j^i$  and  $\rho_j^i$ .  
 424 Similarly,  $S^i(a)$ ,  $L^i(a)$ , and  $B^i(a)$  are replaced by  $S_j^i$ ,  $L_j^i$ , and  $B_j^i$ . Insertion in Eq (3)  
 425 and integrating over the (constant) rates yields

$$\begin{aligned}
 S_j^i &= S_0 e^{-\Delta a \sum_{k=1}^j \lambda_k^i} \\
 L_j^i &= (1 - S_0) e^{-\Delta a \sum_{k=1}^j \rho_k^i + z \lambda_k^i} + \\
 & S_0 \sum_{k=1}^j \lambda_k^i \frac{e^{-\Delta a (\rho_k^i + z \lambda_k^i)} - e^{-\Delta a \lambda_k^i}}{(1 - z) \lambda_k^i - \rho_k^i} \times \\
 & e^{-\Delta a (\sum_{l=1}^{k-1} \lambda_l^i - \sum_{l=k+1}^j \rho_l^i + z \lambda_l^i)},
 \end{aligned} \tag{5}$$

426 where  $i \in \{\varphi, \sigma\}$  and  $B_j^i = 1 - S_j^i - L_j^i$ . Insertion of Eq (5) in Eq (2) and making use of  
427 the fact that the cumulative incidences of infection and reactivation/re-infection in age  
428 class  $j$  are given by  $\int_{a_{[j]}}^{a_{[j+1]}} \lambda^i(a) S^i(a) da = S^i(a_{[j]}) - S^i(a_{[j+1]})$  and  
429  $B^i(a_{[j+1]}) - B^i(a_{[j]})$ , yields  $2n = 32$  equations ( $n = 16$  per sex) for the forces of  
430 infection. These equations can be solved numerically. Here we use a Quasi-Newton  
431 (secant) method to solve the equations.

## 432 Likelihood and estimation

433 With transition rates and forces of infection at hand, we calculate the log-likelihood of  
434 the data. Here, the log-likelihood of each observation is given by a mixture distribution.  
435 For instance, the log-likelihood contribution of a sample with antibody measurement  $c$   
436 in a person of sex  $i$  and age  $a$  is given by  $\log(S^i(a)f_S(c) + L^i(a)f_I(c) + B^i(a)f_B(c))$ ,  
437 where  $S^i(a)$ ,  $L^i(a)$ , and  $B^i(a)$  are the age specific prevalences in sex  $i$ , and  $f_S(c)$ ,  $f_L(c)$ ,  
438 and  $f_B(c)$  are the densities of the mixture distributions at antibody concentration  $c$ .

439 To reduce computation times and enable better comparison of the prevalence  
440 estimates of the statistical and mechanistic models, we take the posterior medians of the  
441 component distributions of the logistic model as inputs in the transmission model.  
442 Hence, the transmission model takes the component distributions as given and provides  
443 estimate the prevalences via the transmission and reactivation rates. Here, based on  
444 preliminary analyses, reactivation rates are modeled by piecewise constant functions  
445 with steps at 20 and 50 years, i.e. with constant rates on the intervals  $[0, 20)$ ,  $[20, 50)$ ,  
446 and  $[50, 80)$  years. Hence, the reactivation rates are characterized by three parameters  
447 in each sex, viz.  $\rho_{[0,20)}^i$ ,  $\rho_{[20,50)}^i$ , and  $\rho_{[50,80)}^i$  ( $i \in \{\varphi, \sigma\}$ ).

448 We employ a Markov chain Monte Carlo (MCMC) method to obtain maximum  
449 likelihood (ML) estimates in a pre-screening of models as well as Bayesian estimates for  
450 a subset of models that perform well in the pre-screening. For this purpose, we take  
451 non-informative (improper) uniform prior distributions for all parameters. Steps in the  
452 estimation procedure are as follows. First, for new parameters  $\beta_1$ ,  $\beta_2$ ,  $z$ , or  $\rho_x^i$  we solve  
453 the  $2n = 32$  equations for the forces of infection  $\lambda_k^i$ . Second, we use the forces of  
454 infection to calculate the age-specific prevalences  $S^i(a)$ ,  $L^i(a)$ , and  $B^i(a)$ . Third, the  
455 age-specific prevalences are used to calculate the log-likelihood. Fourth, the new

456 parameters are accepted or rejected, and the above steps are repeated. Throughout,  
457 updating of parameters is based on a single component random-walk Metropolis  
458 algorithm using Normal proposal distributions with the current value as mean and  
459 standard deviations tuned to achieve acceptance ratios in the 20%-50% range. In the  
460 Bayesian analyses, output is generated for 5,000 cycles after a burn-in of 1,000, and a  
461 thinned sample of 1,000 is used for analysis. Convergence of chains is assessed visually.  
462 Parameter estimates are represented by posterior medians, and bounds of 95% credible  
463 intervals are given by 2.5 and 97.5 percentiles. For model selection, we report the  
464 Watanabe Akaike Information Criterion (WAIC) (using  $p_{\text{WAIC2}}$ , see [22,23]). We have  
465 performed a pre-screening of models using ML since the Bayesian analysis does not  
466 always yield properly converged chains for poorly fitting models. Here, we use a  
467 simulated annealing method in which the Metropolis acceptance probability  $p$  is  
468 replaced by  $p^{1/T}$ , where  $T = 1/\sqrt{t}$  is the temperature at iteration  $t$ . In this manner,  
469 proper ML estimates can be obtained within hours ( $\sim 500$  iterations). Comparison of  
470 models in the pre-screening is based on the Akaike Information Criterion (AIC). The  
471 analyses are performed with Mathematica 10.0.

472 In the main text we consider a suite of simplifications of the full model specified by  
473 Equations (1)-(2). In the simplification we assume that (i) there is no re-infection  
474 ( $z = 0$ ), (ii) there is no reactivation ( $\rho_x^i = 0$  for all  $i$  and  $x$ ), or (iii) reactivation and  
475 re-infection are not infectious ( $\beta_2 = 0$ ).

## 476 **Reproduction numbers**

477 With estimates of key parameters at hand we can further our understanding of the  
478 transmission dynamics of CMV, e.g., by calculation of the basic and type reproduction  
479 numbers [47]. These reproduction number give insight in the drivers of transmission,  
480 and also in the control effort required for elimination or eradication. Full calculation is  
481 not straightforward, as CMV can be transmitted after primary infection, after  
482 reactivation, and perinatally from mother to offspring. While our analyses have yielded  
483 estimates of the former two, formal estimates of perinatal transmission are still lacking.  
484 Furthermore, calculation of reproduction numbers implicitly assume a stable host  
485 demography and known female fertility distribution function [51]. To obtain partial

486 insight of the impact of the transmission by sex, age and transmission route, we assume  
487 type 1 demography (everybody lives exactly to the age of  $M = 80$  years), and calculate  
488 reproduction numbers in the presence of direct transmission and transmission after  
489 reactivation but without perinatal transmission. Central in the calculations are the  
490 so-called kernels  $k^{ij}(a, \tau)$  of the next-generation operator, which determine the number  
491 of cases of sex  $i$  and age  $a$  generated by an infected person of sex  $j$  and age  $\tau$ . In our  
492 case, a straightforward calculation [47] shows that  $k^{ij}(a, \tau)$  is given by

$$k^{ij}(a, \tau) = \beta_1 c^{ij}(a, \tau) + \beta_2 \int_{\tau}^M c^{ij}(a, \tau') \rho^j(\tau') e^{-\int_{\tau'}^{\tau} \rho^j(v) dv} d\tau'$$

493 Discretizing the above kernel while making the simplifying assumption that only a  
494 single event can happen in any one age group, we obtain approximate estimates of the  
495 sex- and age-specific reproduction numbers, collected in the so-called next-generation  
496 matrix (Fig 12). Subsequently, we derive estimates of the basic reproduction number  $R_0$   
497 and the reproduction numbers between the sexes  $R^{ij}$  as the dominant eigenvalues of the  
498 next-generation matrix and the sex-specific next-generation matrices, respectively.  
499 These calculations give the following results:  $R_0$  is estimated (by its posterior median)  
500 at 0.83 (95%CrI: 0.78-0.93), and the type reproduction numbers are estimated at 0.57  
501 (95%CrI: 0.53-0.62) for transmission from female to female, 0.45 (95%CrI: 0.42-0.50) for  
502 transmission from female to male, 0.30 (95%CrI: 0.25-0.36) for transmission from male  
503 to female, and 0.31 (95%CrI: 0.28-0.40) for transmission from male to male. Hence, the  
504 above estimates indicate that females contribute more to overall transmission than  
505 males because of the higher estimated rates of reactivation in females than in males,  
506 while CMV would be unable to persist in the population in the absence of perinatal  
507 transmission (as  $R_0 < 1$ ).

508 Fig 12 further shows that males older than 50 years do not infect many persons  
509 because they have a low reactivation rates and low contact intensities. Infected females,  
510 especially young females, are expected to infect significantly more persons, the reason  
511 being that their reactivation rates and contact intensities are higher. The observation  
512 that both males and females generally infect persons that are older than themselves can  
513 be explained by the fact that reactivation generally occurs years after primary infection,  
514 and that such reactivation is expected to produce infection in persons who have similar

515 age at the moment of reactivation, due to highly age-assortative mixing patterns  
516 (Fig 11).

517 The above analyses can be generalized and made more precise by using full vital  
518 statistics of the population (i.e. by using historical age-specific birth rates and  
519 anticipated future trends, and historical and anticipated age- and sex-specific mortality  
520 rates), but this is beyond the scope of the current study. The above partial analyses  
521 provided here do provide evidence that CMV needs both perinatal transmission and  
522 transmission after reactivation to be able to persist in the population.

## 523 **Acknowledgments**

524 We thank Can Keşmir for discussion, and the persons included in the PIENTER2 study  
525 for their participation.

## 526 **Competing interests**

527 This work was supported by the Dutch Ministry of Health, Welfare and Sport and the  
528 Netherlands Organisation for Scientific Research (grants 645.000.002 and 823.02.014).  
529 The funders had no role in study design, data collection and analysis, decision to publish,  
530 or preparation of the manuscript. All authors declare that no competing interests exist.

## 531 **References**

- 532 [1] Cannon MJ, Schmid DS, Hyde TB. Review of cytomegalovirus seroprevalence and  
533 demographic characteristics associated with infection. *Rev Med Virol.*  
534 2010;20(4):202–213.
- 535 [2] Dollard SC, Grosse SD, Ross DS. New estimates of the prevalence of neurological  
536 and sensory sequelae and mortality associated with congenital cytomegalovirus  
537 infection. *Rev Med Virol.* 2007;17(5):355–363.
- 538 [3] Kenneson A, Cannon MJ. Review and meta-analysis of the epidemiology of  
539 congenital cytomegalovirus (CMV) infection. *Rev Med Virol.* 2007;17(4):253–276.

- 540 [4] Griffiths P, Plotkin S, Mocarski E, Pass R, Schleiss M, Krause P, et al. Desirability  
541 and feasibility of a vaccine against cytomegalovirus. *Vaccine*. 2013;31 Suppl  
542 2:197–203.
- 543 [5] Ramanan P, Razonable RR. Cytomegalovirus infections in solid organ  
544 transplantation: a review. *Infect Chemother*. 2013;45(3):260–271.
- 545 [6] Boeckh M, Geballe AP. Cytomegalovirus: pathogen, paradigm, and puzzle. *J Clin*  
546 *Invest*. 2011;121(5):1673–1680.
- 547 [7] Pawelec G, Derhovanessian E. Role of CMV in immune senescence. *Virus Res*.  
548 2011;157(2):175–179.
- 549 [8] Pawelec G. Immunosenescence: role of cytomegalovirus. *Exp Gerontol*.  
550 2014;54:1–5.
- 551 [9] Sansoni P, Vescovini R, Fagnoni FF, Akbar A, Arens R, Chiu YL, et al. New  
552 advances in CMV and immunosenescence. *Exp Gerontol*. 2014;55:54–62.
- 553 [10] Klenerman P, Oxenius A. T cell responses to cytomegalovirus. *Nat Rev Immunol*.  
554 2016;16(6):367–377.
- 555 [11] Derhovanessian E, Maier AB, Hahnel K, McElhaney JE, Slagboom EP, Pawelec G.  
556 Latent infection with cytomegalovirus is associated with poor memory CD4 responses  
557 to influenza A core proteins in the elderly. *J Immunol*. 2014;193(7):3624–3631.
- 558 [12] Frasca D, Diaz A, Romero M, Landin AM, Blomberg BB. Cytomegalovirus (CMV)  
559 seropositivity decreases B cell responses to the influenza vaccine. *Vaccine*.  
560 2015;33(12):1433–1439.
- 561 [13] Frasca D, Blomberg BB. Aging, cytomegalovirus (CMV) and influenza vaccine  
562 responses. *Hum Vaccin Immunother*. 2016;12(3):682–690.
- 563 [14] Sung H, Schleiss MR. Update on the current status of cytomegalovirus vaccines.  
564 *Expert Rev Vaccines*. 2010;9(11):1303–1314.
- 565 [15] Plotkin S. The history of vaccination against cytomegalovirus. *Med Microbiol*  
566 *Immunol*. 2015;204(3):247–254.



- 567 [16] Staras SA, Dollard SC, Radford KW, Flanders WD, Pass RF, Cannon MJ.  
568 Seroprevalence of cytomegalovirus infection in the United States, 1988-1994. *Clin*  
569 *Infect Dis.* 2006;43(9):1143–1151.
- 570 [17] Staras SA, Flanders WD, Dollard SC, Pass RF, McGowan JE, Cannon MJ.  
571 Cytomegalovirus seroprevalence and childhood sources of infection: A  
572 population-based study among pre-adolescents in the United States. *J Clin Virol.*  
573 2008;43(3):266–271.
- 574 [18] Bate SL, Dollard SC, Cannon MJ. Cytomegalovirus seroprevalence in the United  
575 States: the national health and nutrition examination surveys, 1988-2004. *Clin Infect*  
576 *Dis.* 2010;50(11):1439–1447.
- 577 [19] Korndewal MJ, Mollema L, Tcherniaeva I, van der Klis F, Kroes AC,  
578 Oudesluys-Murphy AM, et al. Cytomegalovirus infection in the Netherlands:  
579 seroprevalence, risk factors, and implications. *J Clin Virol.* 2015;63:53–58.
- 580 [20] Alonso Arias R, Moro-Garcia MA, Echeverria A, Solano-Jaurrieta JJ,  
581 Suarez-Garcia FM, Lopez-Larrea C. Intensity of the humoral response to  
582 cytomegalovirus is associated with the phenotypic and functional status of the  
583 immune system. *J Virol.* 2013;87(8):4486–4495.
- 584 [21] Burnham KP, Anderson DR. *Model Selection and Multimodel Inference: A*  
585 *Practical Information-Theoretic Approach.* Springer New York; 2003. Available from:  
586 <https://books.google.nl/books?id=BQYR6js0CC8C>.
- 587 [22] Vehtari A, Gelman A, Gabry J. Practical Bayesian model evaluation using  
588 leave-one-out cross-validation and WAIC. *Statistics and Computing.* 2016;in press.
- 589 [23] Piironen J, Vehtari A. Comparison of Bayesian predictive methods for model  
590 selection. *Statistics and Computing.* 2016; p. 1–25. doi:10.1007/s11222-016-9649-y.
- 591 [24] van de Kastele J, van Eijkeren J, Wallinga J. High-resolution estimates of social  
592 contact intensity between men and women reveal strong dependency on age, contact  
593 setting, and day of the week. *Annals of Applied Statistics,* in press. 2016;.

- 594 [25] van Lier A, Lugner A, Opstelten W, Jochemsen P, Wallinga J, Schellevis F, et al.  
595 Distribution of Health Effects and Cost-effectiveness of Varicella Vaccination are  
596 Shaped by the Impact on Herpes Zoster. *EBioMedicine*. 2015;2(10):1494–1499.
- 597 [26] Hens N, Shkedy Z, Aerts M, Faes C, Van Damme P, Beutels P. Modeling Infectious  
598 Disease Parameters Based on Serological and Social Contact Data. Springer New  
599 York; 2012.
- 600 [27] Hamprecht K, Maschmann J, Vochem M, Dietz K, Speer CP, Jahn G.  
601 Epidemiology of transmission of cytomegalovirus from mother to preterm infant by  
602 breastfeeding. *Lancet*. 2001;357(9255):513–518.
- 603 [28] Cannon MJ, Hyde TB, Schmid DS. Review of cytomegalovirus shedding in bodily  
604 fluids and relevance to congenital cytomegalovirus infection. *Rev Med Virol*.  
605 2011;21(4):240–255.
- 606 [29] Pass RF, Anderson B. Mother-to-Child Transmission of Cytomegalovirus and  
607 Prevention of Congenital Infection. *J Pediatric Infect Dis Soc*. 2014;3 Suppl 1:2–6.
- 608 [30] van der Klis FR, Mollema L, Berbers GA, de Melker HE, Coutinho RA. Second  
609 national serum bank for population-based seroprevalence studies in the Netherlands.  
610 *Neth J Med*. 2009;67(6):301–308.
- 611 [31] Parry HM, Zuo J, Frumento G, Mirajkar N, Inman C, Edwards E, et al.  
612 Cytomegalovirus viral load within blood increases markedly in healthy people over  
613 the age of 70 years. *Immun Ageing*. 2016;13:1.
- 614 [32] Stowe RP, Kozlova EV, Yetman DL, Walling DM, Goodwin JS, Glaser R. Chronic  
615 herpesvirus reactivation occurs in aging. *Exp Gerontol*. 2007;42(6):563–570.
- 616 [33] Cannon MJ, Stowell JD, Clark R, Dollard PR, Johnson D, Mask K, et al. Repeated  
617 measures study of weekly and daily cytomegalovirus shedding patterns in saliva and  
618 urine of healthy cytomegalovirus-seropositive children. *BMC Infect Dis*. 2014;14:569.
- 619 [34] Woestenberg PJ, Tjhe JH, de Melker HE, van der Klis FR, van Bergen JE,  
620 van der Sande MA, et al. Herpes simplex virus type 1 and type 2 in the Netherlands:  
621 seroprevalence, risk factors and changes during a 12-year period. *BMC Infect Dis*.  
622 2016;16:364.

- 623 [35] Korndewal MJ, Vossen AC, Cremer J, VAN Binnendijk RS, Kroes AC, VAN  
624 DER Sande MA, et al. Disease burden of congenital cytomegalovirus infection at  
625 school entry age: study design, participation rate and birth prevalence. *Epidemiol  
626 Infect.* 2016;144(7):1520–1527.
- 627 [36] Sabbaj S, Pass RF, Goepfert PA, Pichon S. Glycoprotein B vaccine is capable of  
628 boosting both antibody and CD4 T-cell responses to cytomegalovirus in chronically  
629 infected women. *J Infect Dis.* 2011;203(11):1534–1541.
- 630 [37] Bialas KM, Permar SR. The March towards a Vaccine for Congenital CMV:  
631 Rationale and Models. *PLOS Pathog.* 2016;12(2):e1005355.
- 632 [38] Schleiss MR. Preventing Congenital Cytomegalovirus Infection: Protection to a 'T'.  
633 *Trends Microbiol.* 2016;24(3):170–172.
- 634 [39] Mossong J, Hens N, Jit M, Beutels P, Auranen K, Mikolajczyk R, et al. Social  
635 contacts and mixing patterns relevant to the spread of infectious diseases. *PLOS  
636 Medicine.* 2008;5:e74. doi:10.1371/journal.pmed.0050074.
- 637 [40] Wallinga J, Teunis P, Kretzschmar M. Using data on social contacts to estimate  
638 age-specific transmission parameters for respiratory-spread infectious agents. *Am J  
639 Epidemiol.* 2006;164(10):936–944.
- 640 [41] Goeysvaerts N, Willem L, Van Kerckhove K, Vandendijck Y, Hanquet G, Beutels P,  
641 et al. Estimating dynamic transmission model parameters for seasonal influenza by  
642 fitting to age and season-specific influenza-like illness incidence. *Epidemics.*  
643 2015;13:1–9.
- 644 [42] Te Beest DE, Birrell PJ, Wallinga J, De Angelis D, van Boven M. Joint modelling  
645 of serological and hospitalization data reveals that high levels of pre-existing  
646 immunity and school holidays shaped the influenza A pandemic of 2009 in the  
647 Netherlands. *J R Soc Interface.* 2015;12(103).
- 648 [43] Plummer M. JAGS: A program for analysis of Bayesian graphical models using  
649 Gibbs sampling; 2003.
- 650 [44] R Core Team. R: A Language and Environment for Statistical Computing; 2016.  
651 Available from: <https://www.R-project.org/>.

- 652 [45] Steens A, Waaijenborg S, Teunis PF, Reimerink JH, Meijer A, van der Lubben M,  
653 et al. Age-dependent patterns of infection and severity explaining the low impact of  
654 2009 influenza A (H1N1): evidence from serial serologic surveys in the Netherlands.  
655 *Am J Epidemiol.* 2011;174(11):1307–1315.
- 656 [46] te Beest D, de Bruin E, Imholz S, Wallinga J, Teunis P, Koopmans M, et al.  
657 Discrimination of influenza infection (A/2009 H1N1) from prior exposure by antibody  
658 protein microarray analysis. *PLOS ONE.* 2014;9(11):e113021.
- 659 [47] Diekmann O, Heesterbeek H, Britton T. *Mathematical Tools for Understanding*  
660 *Infectious Disease Dynamics.* Princeton University Press; 2013.
- 661 [48] Farrington CP, Whitaker HJ. Estimation of effective reproduction numbers for  
662 infectious diseases using serological survey data. *Biostatistics.* 2003;4(4):621–632.
- 663 [49] Goeyvaerts N, Hens N, Ogunjimi B, Aerts M, Shkedy Z, van Damme P, et al.  
664 Estimating infectious disease parameters from data on social contacts and serological  
665 status. *Journal of the Royal Statistical Society: Series C (Applied Statistics).*  
666 2010;59(2):255–277. doi:10.1111/j.1467-9876.2009.00693.x.
- 667 [50] Goeyvaerts N, Hens N, Aerts M, Beutels P. Model structure analysis to estimate  
668 basic immunological processes and maternal risk for parvovirus B19. *Biostatistics*  
669 (Oxford, England). 2011;12(2):283–302. doi:10.1093/biostatistics/kxq059.
- 670 [51] Kretzschmar M, de Wit GA, Smits LJ, van de Laar MJ. Vaccination against  
671 hepatitis B in low endemic countries. *Epidemiol Infect.* 2002;128(2):229–244.

672 **Supplementary Figures**

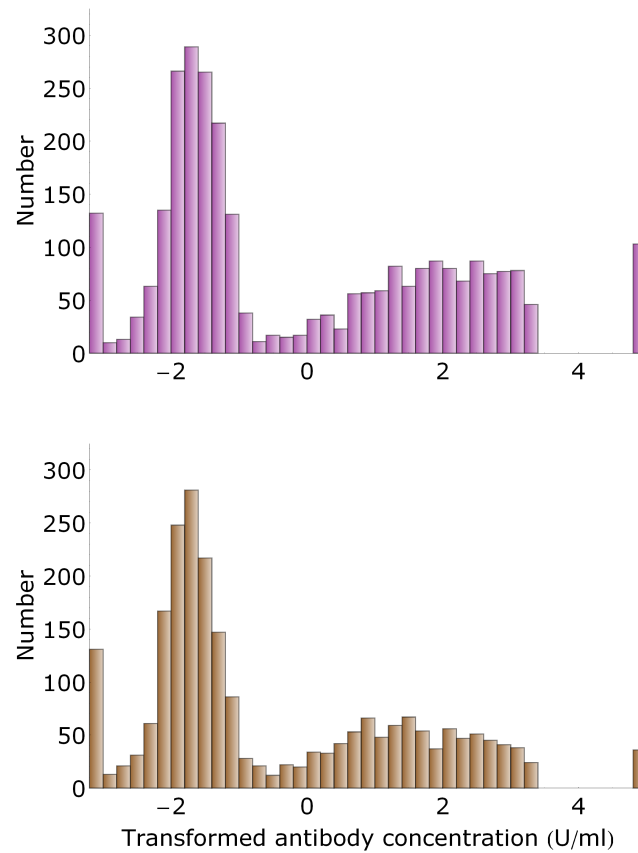

**Fig 7. Numbers of samples as a function of antibody concentration.**

Histograms shows the number of samples by antibody concentration class (top, purple: females; bottom, brown: males). Samples in the bars at 5 U/ml are right-censored at concentration 3.41 U/ml. Total number of female and males samples is 2,842 and 2,337, respectively.

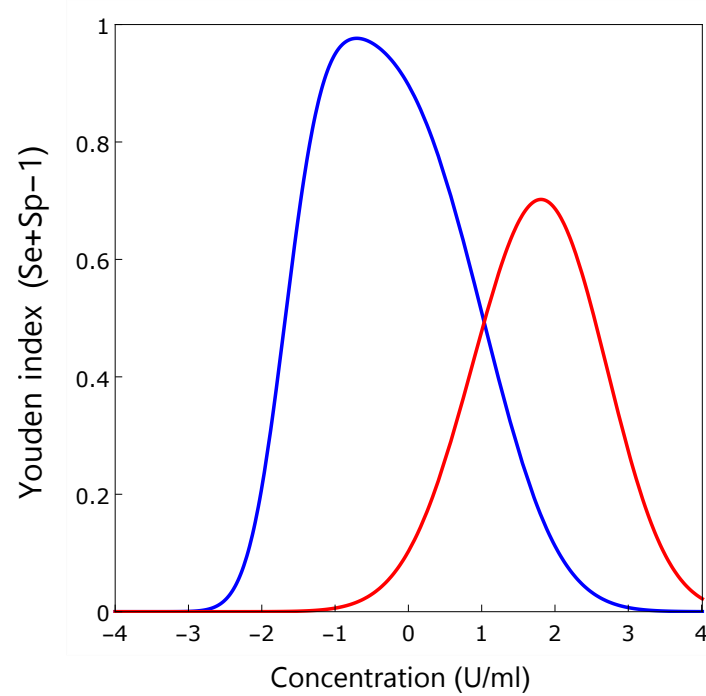

**Fig 8. Youden index as a function of antibody concentration.** Shown are the Youden indices ( $Se+Sp-1$ ) for binary classifications, i.e. when using the antibody concentration on the x-axis as cut-off. Classifications are uninfected (S) versus infected (L+B; blue line) and uninfected plus infected with intermediate antibody concentration (S+L) versus infected with increased antibody concentration (B; red line).

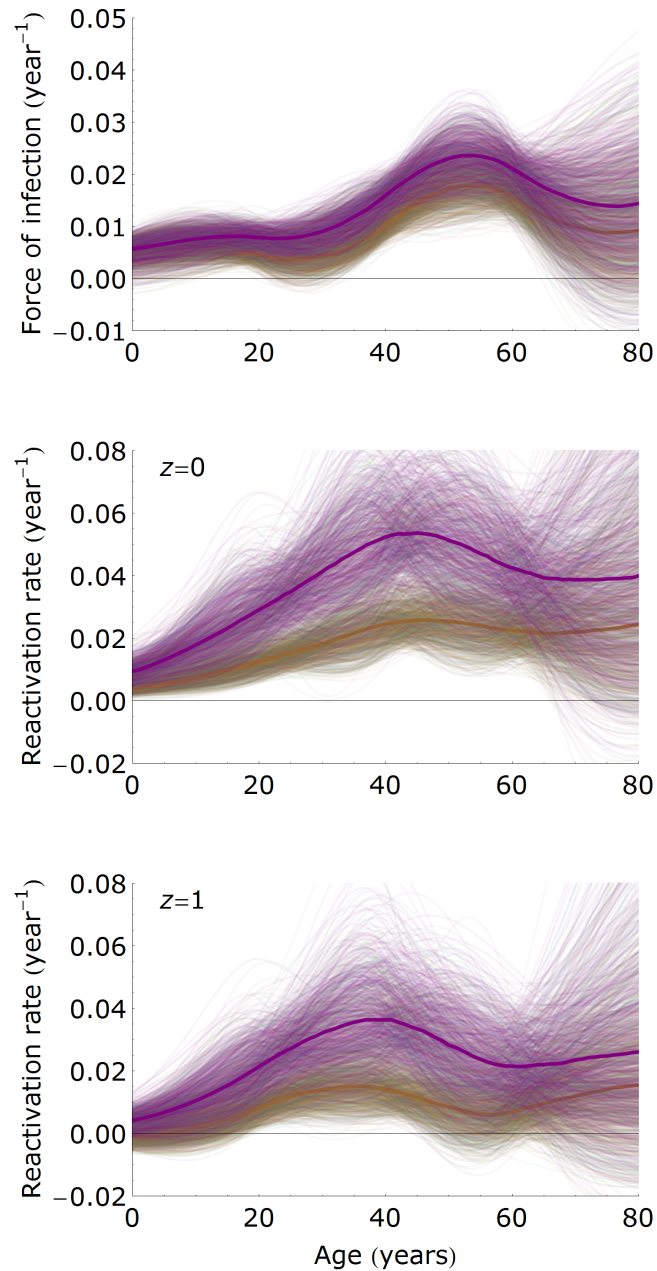

**Fig 9. Estimates of transmission parameters with the mixture model.**

Shown are estimates of the forces of infection (top panel) and reactivation rates (middle and bottom panel) in females (purple) and males (brown) based on spline estimates of the age specific prevalence in the mixture model and Equation (3). The middle panel shows results in the absence of re-infection ( $z = 0$ ), and the bottom panel if re-infection occurs at the same rate as primary infection ( $z = 1$ ). Shown are 1,000 samples from the posterior distribution (thin lines) with the posterior medians (bold lines). Notice that the force of infection is higher in females than in males, that the reactivation rate is substantially higher in females than in males, and that both the reactivation rates and forces of infection are highest in 30 – 50 year old persons.

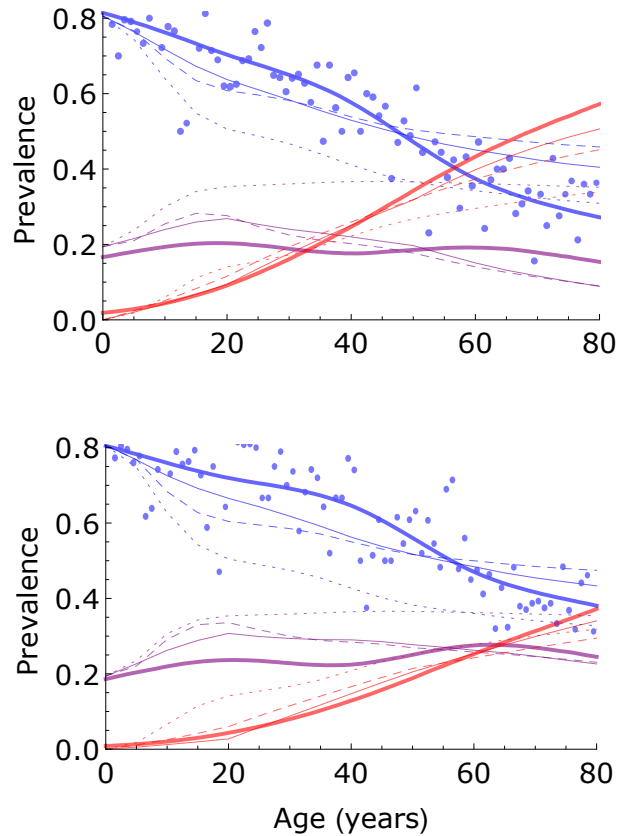

**Fig 10. Comparison of fits of the statistical and transmission models.** Shown are prevalence estimates for females (top) and males (bottom), and for classes of low (blue), medium (purple), and high (red) antibody measurements. The data and fit (posterior medians) of the statistical model are indicated by dots and thick lines, respectively (cf. Fig 3). Thin solid lines show the fit (using the ML parameter estimates) of the transmission model with infectious reactivation and re-infection. Dotted and dashed lines show the fits of the transmission model with no reactivation and with reactivation and re-infection not being infectious, respectively. The fit of the transmission model with infectious reactivation but no re-infection is very close to the fit of the full model with infectious reactivation and infectious re-infection, and is not shown.



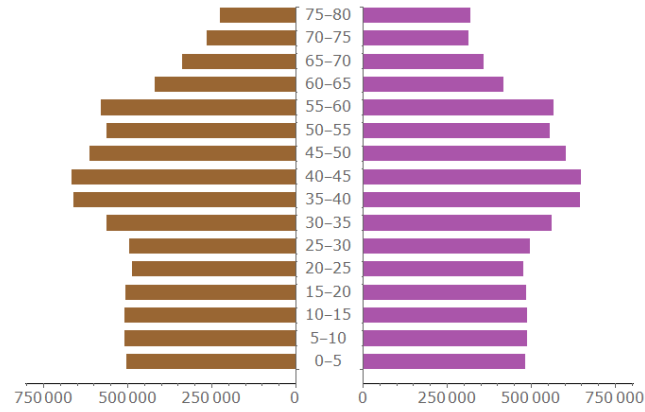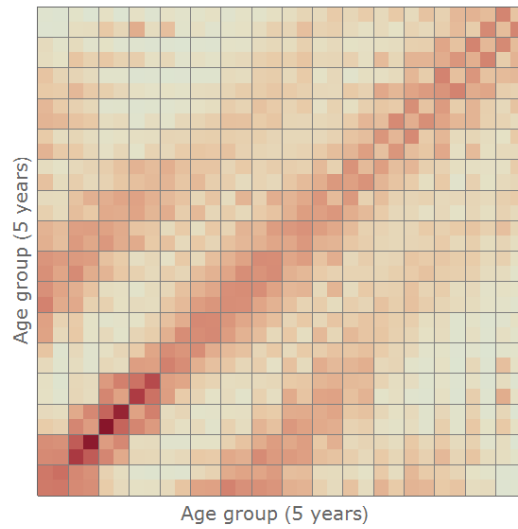

**Fig 11. Demography and contact patterns.** Shown are the demographic composition of the Dutch population in 2007 and estimated contact rates using data from 2006-2007. The main stratification of contact rates in 5-year age groups, and the secondary stratification by sex (2 by 2 blocks). See [24] for details.

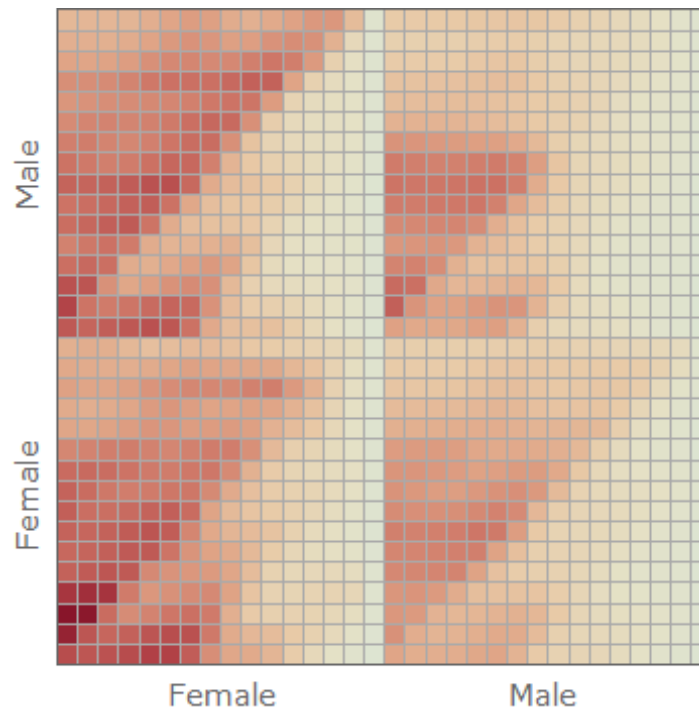

**Fig 12. Graphical representation of the next-generation matrix.** Shown is the next-generation matrix, stratified by sex and age (16 age groups of 5 years). The top left-hand block shows  $k^{\sigma\varphi}$ , representing the female-to-male transmission ( $R^{\sigma\varphi} = 0.45$ ). Top right-hand block represents male-to-male transmission ( $R^{\sigma\sigma} = 0.31$ ). The bottom blocks depict the female-to-female and male-to-female transmission matrices ( $R^{\varphi\varphi} = 0.57$  and  $R^{\varphi\sigma} = 0.30$ ). The basic reproduction number is  $R_0 = 0.83$ . Orange and blue represent high and low transmission intensity, respectively.
